# Supplementary material
Source: PubMed Central journal article supplement (PMC3517238)
Supplement: supp_tpc.112.102483_tpc102483Supplemental.pdf [file supp_tpc.112.102483_tpc102483Supplemental.pdf]

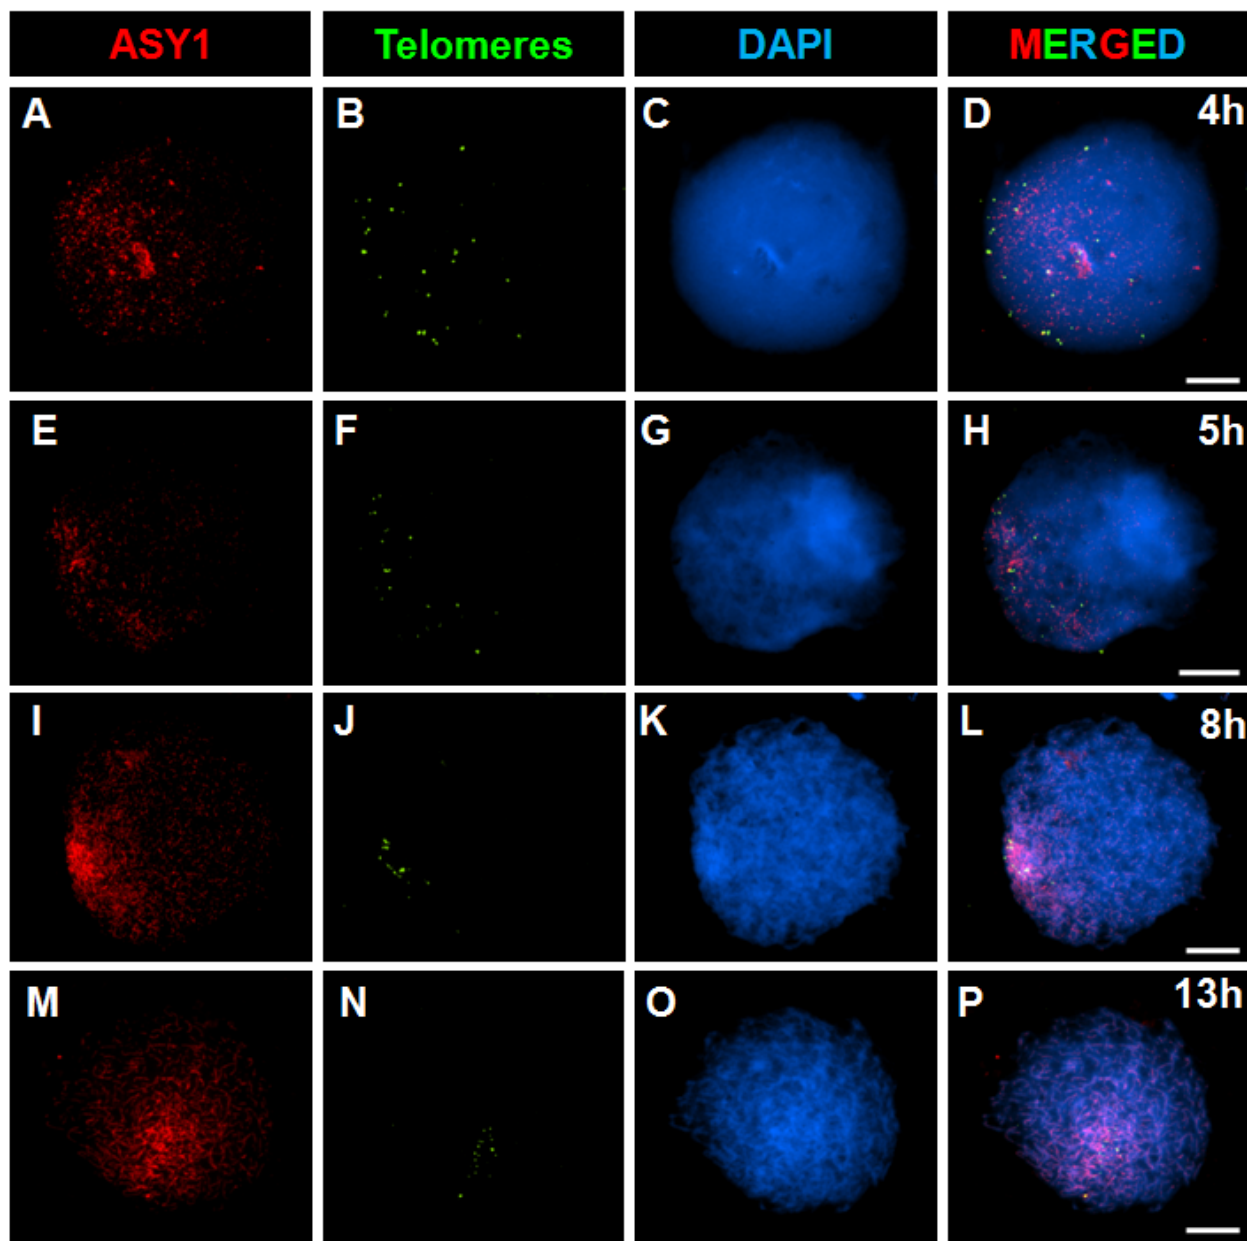

**Supplemental Figure 2** Axis morphogenesis in relation to telomere clustering (unmerged images from Figure 2).

As a marker for chromosome axis formation, ASY1 foci (red) are initially observed adjacent to the telomeres (green) (A-H) and as the ASY1 signal progressively linearises (I) the telomeres cluster into a 'bouquet' (J), which persists through leptotene (M-P). Bar, 10 $\mu$ M.

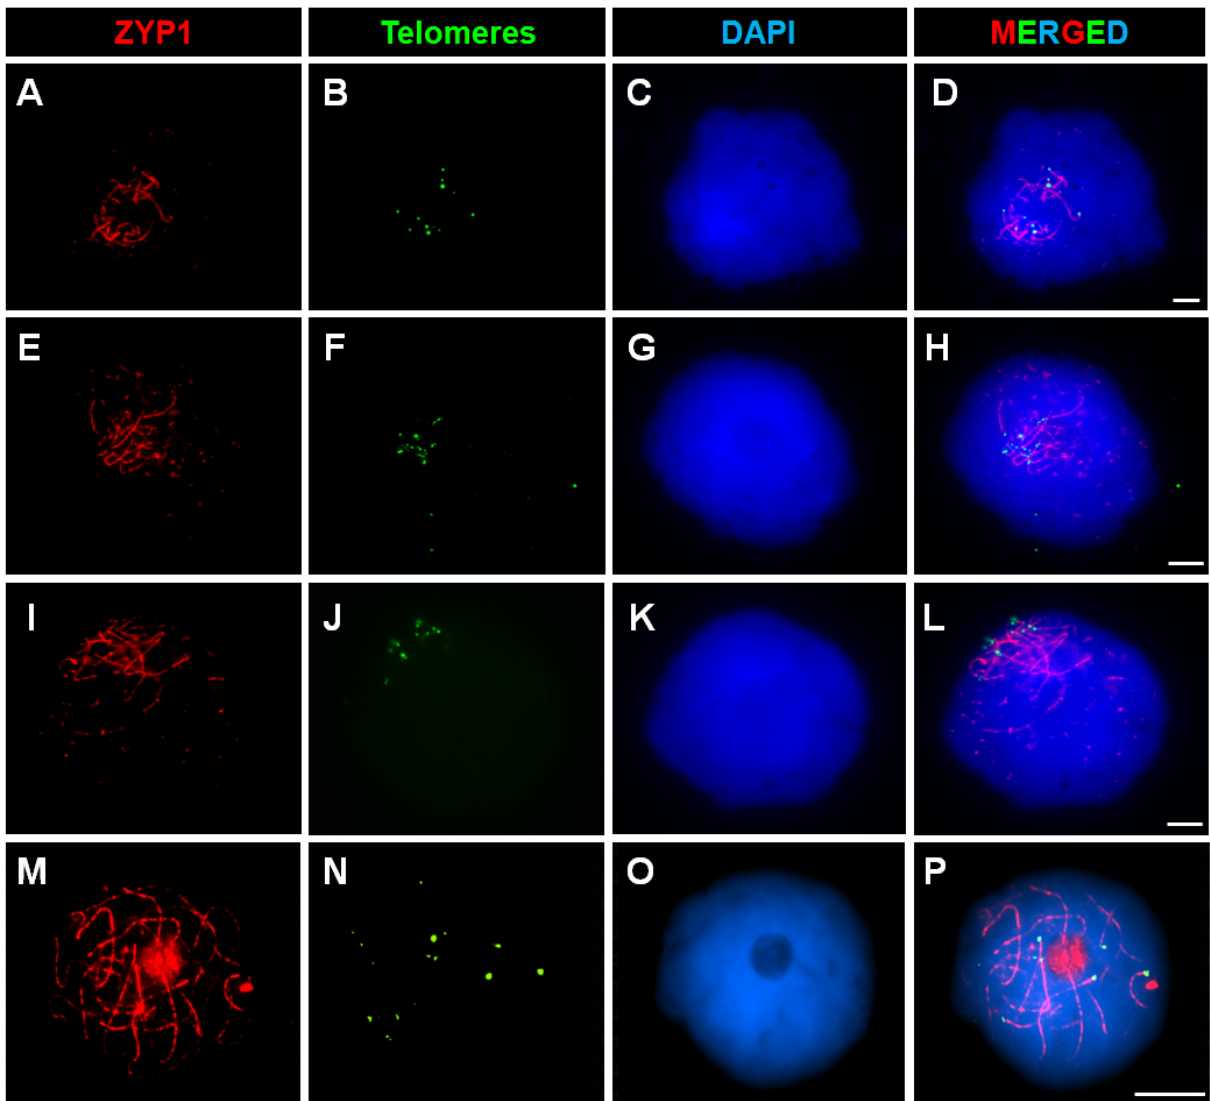

**Supplemental Figure 3** Chromosome synapsis initiates from sub-telomeric regions (unmerged images from Figure 2)

As a marker for chromosome synapsis, ZYP1 stretches (red) are initially observed adjacent to the telomeres (green) (A-H). As the ZYP1 signal extends from the sub-telomeric regions, further synapsis initiation sites are observed in the interstitial regions (I-L) until synapsis is complete (M-P). Bar, 10 $\mu$ M.

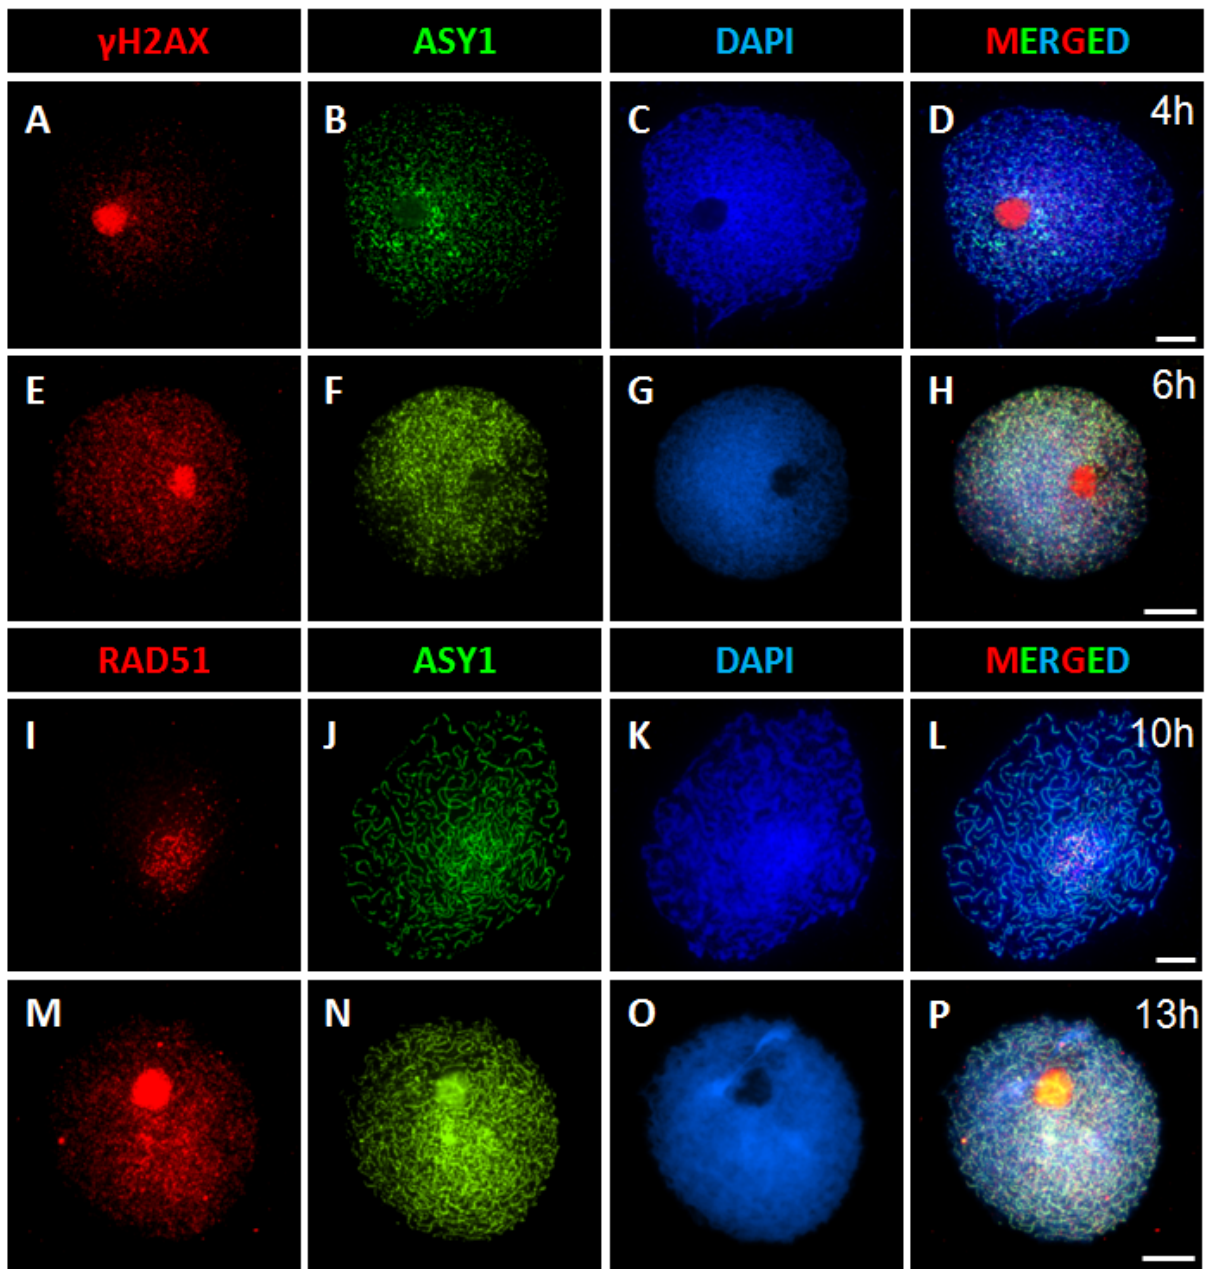

**Supplemental Figure 4** Axis morphogenesis in relation to early recombination markers (unmerged images from Figure 2).

Markers for recombination ( $\gamma$ H2AX, **A-D**; RAD51, **I-L**) are initially observed as a cluster in the distal regions (corresponding to the most intense region of ASY1 staining) where axis morphogenesis is most advanced and later throughout the nucleus ( $\gamma$ H2AX, **E-H**; RAD51, **M-P**). Note: the intense 'ball like' structure is the nucleolus. Bar, 10 $\mu$ M.

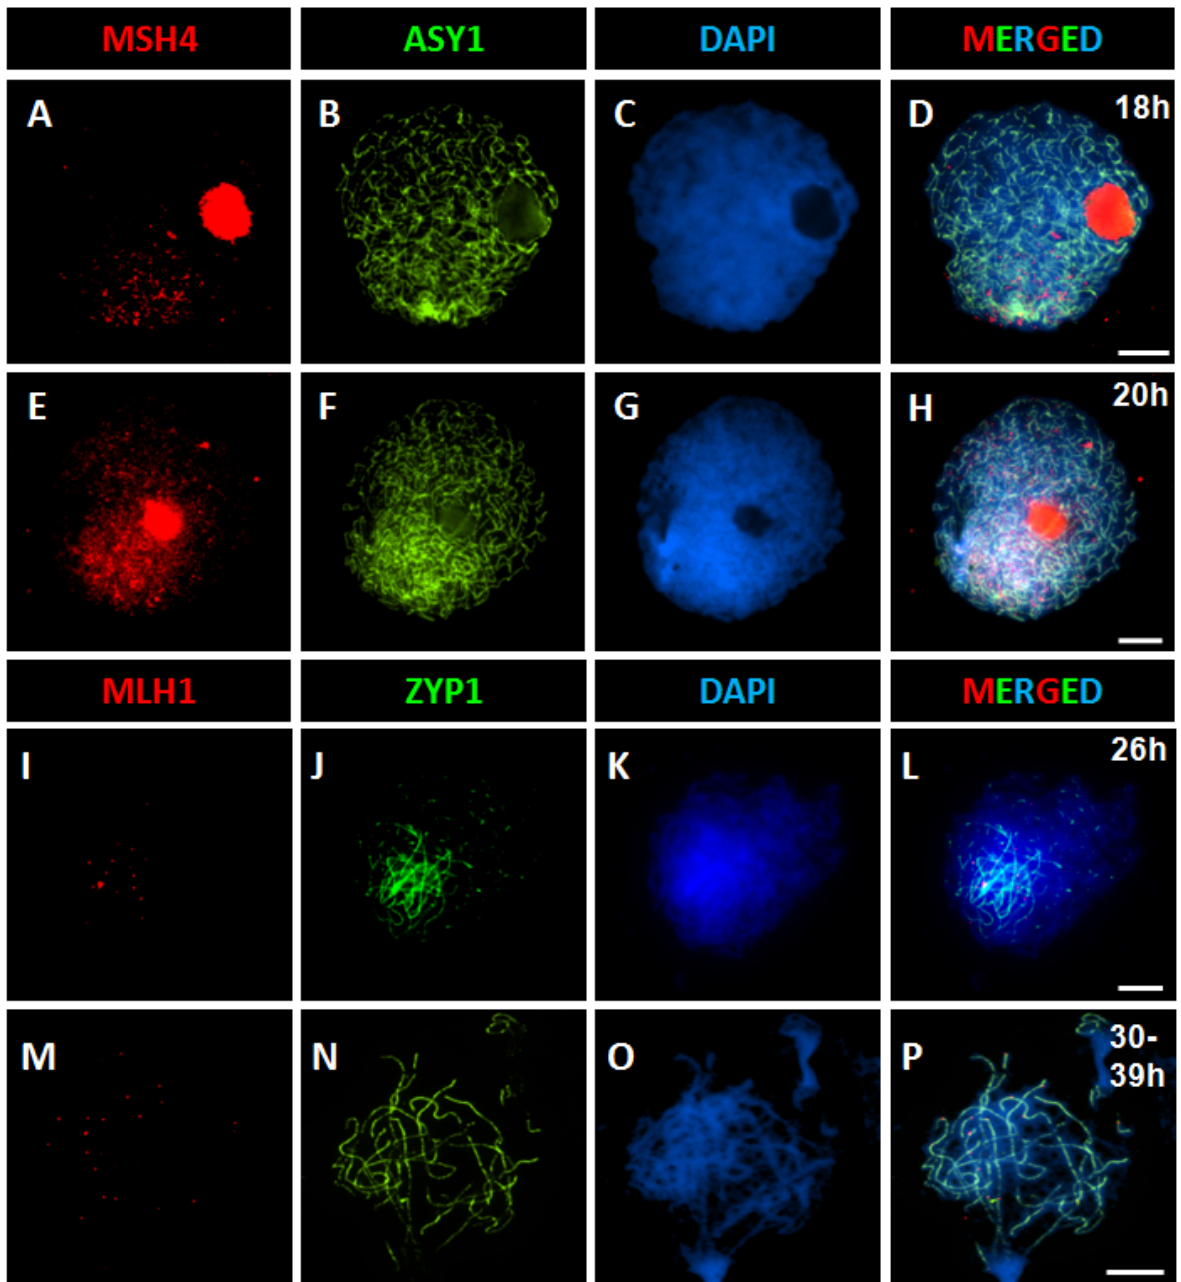

**Supplemental Figure 5** Axis morphogenesis in relation to late recombination markers (unmerged from Figure 2)

MSH4 is initially observed as a cluster of foci in the distal regions (**A-D**) and later throughout the nucleus (**E-H**). MLH1 is initially observed contiguous with synapsis in the distal regions (**I-L**) and later still appears to be in these regions (**M-P**). Note: the intense 'ball like' structure is the nucleolus. Bar, 10 $\mu$ M.

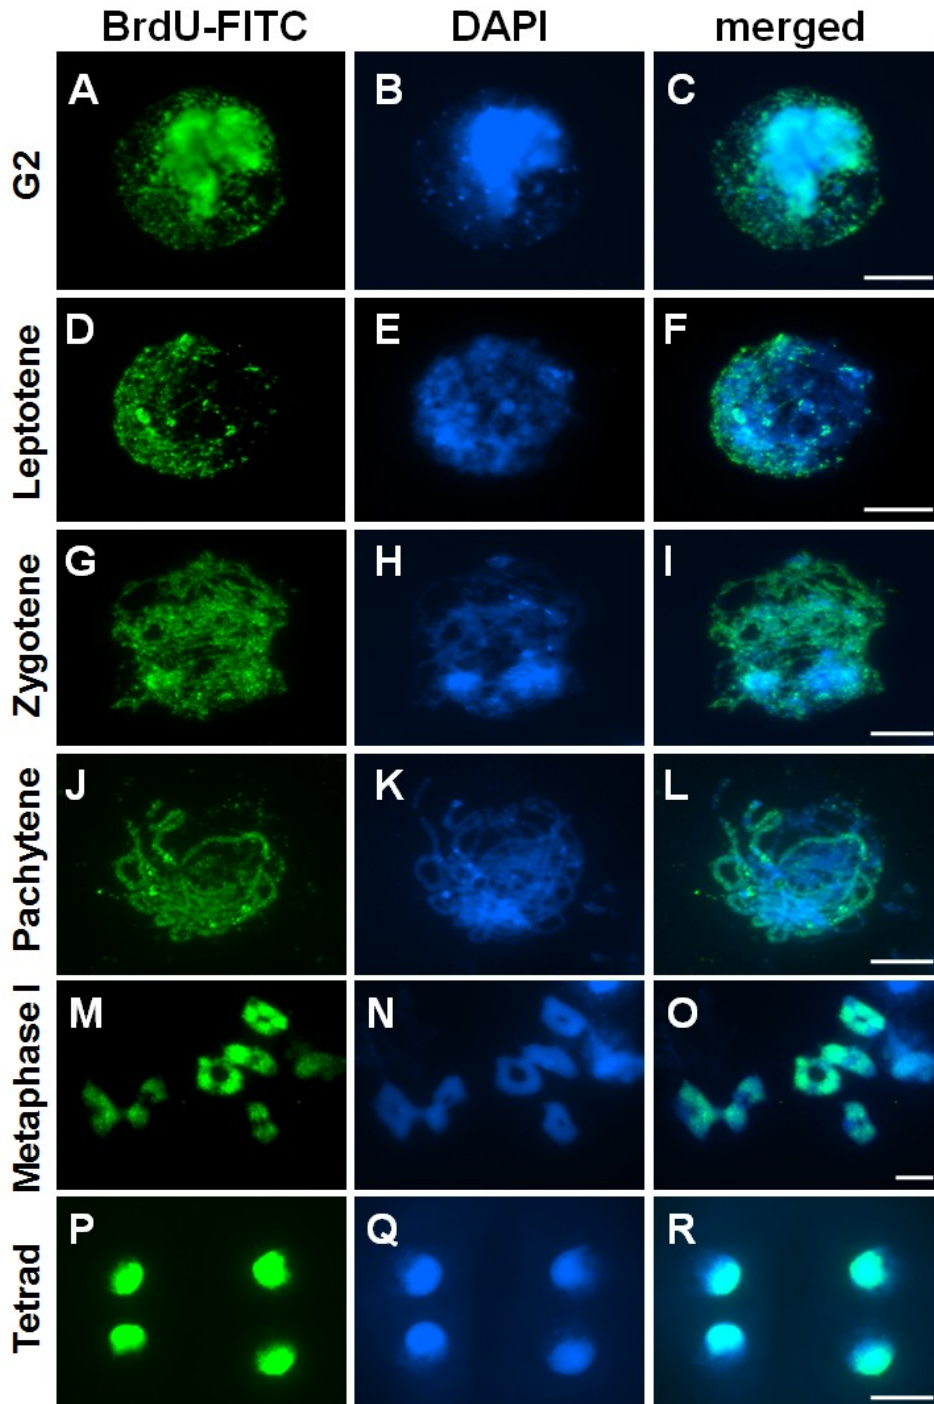

**Supplemental Figure 6** A cytological meiotic time-course

5-bromo-2'-deoxyuridine(BrdU) is incorporated into newly synthesised DNA during pre-meiotic S-phase and detected with an anti-BrdU antibody labelled with FITC (green). Leptotene nuclei with labelled BrdU were observed after 13h (**D-F**), followed by zygotene at 25h (**G-I**), pachytene 30h (**J-L**), metaphase I 40h (**M-O**) and tetrad 43h (**P-R**). Nuclei were counterstained with DAPI (blue). Bar, 10 $\mu$ M.

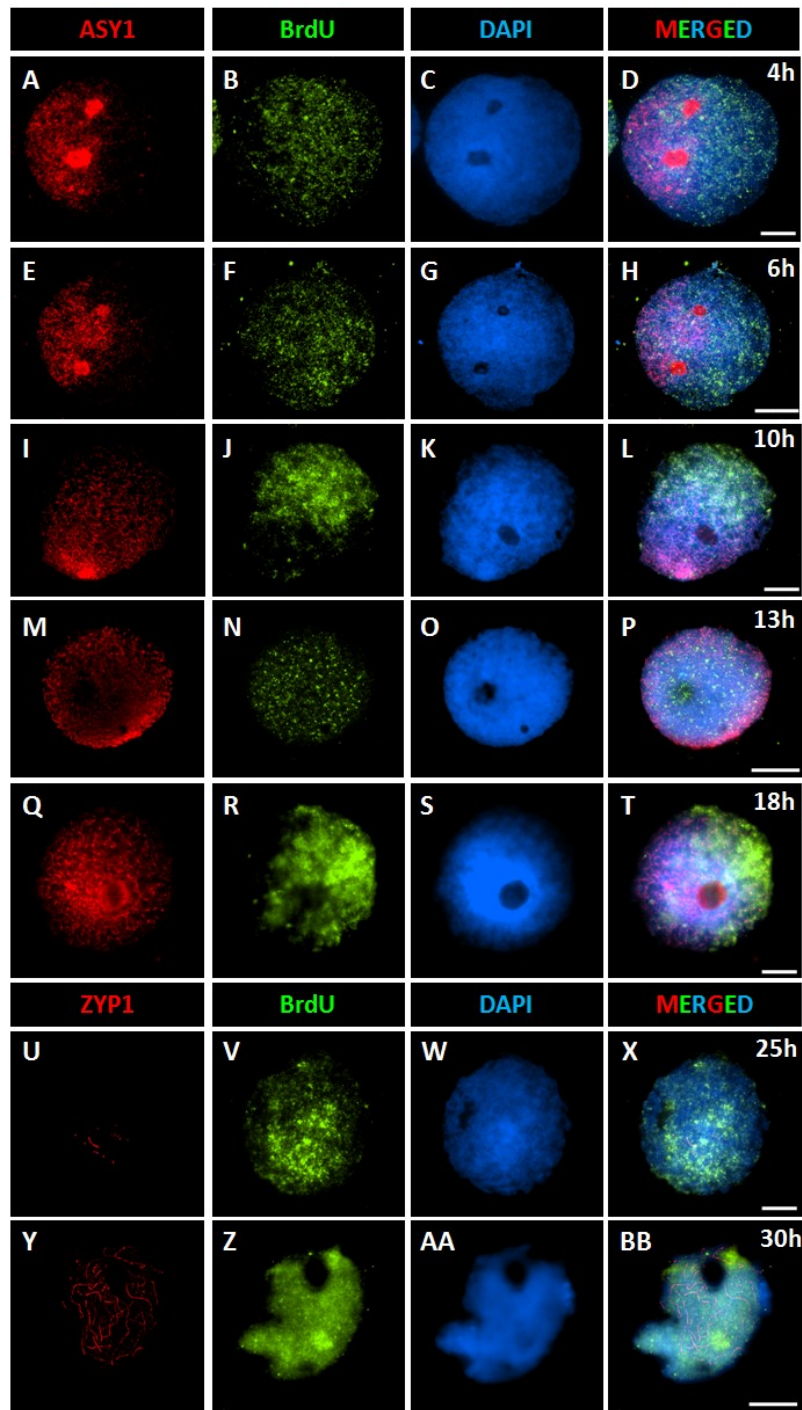

**Supplemental Figure 7** An immunological time-course of barley meiotic prophase I

5-bromo-2'-deoxyuridine (BrdU) is incorporated into newly synthesised DNA during pre-meiotic S-phase and detected with an anti-BrdU antibody labelled with FITC (green). By dual labelling with markers for chromosome axis formation (ASY1, red) (**A-T**) and synapsis (ZYP1, red) (**U, BB**) the duration of meiotic stages can be determined. Bar, 10µM.

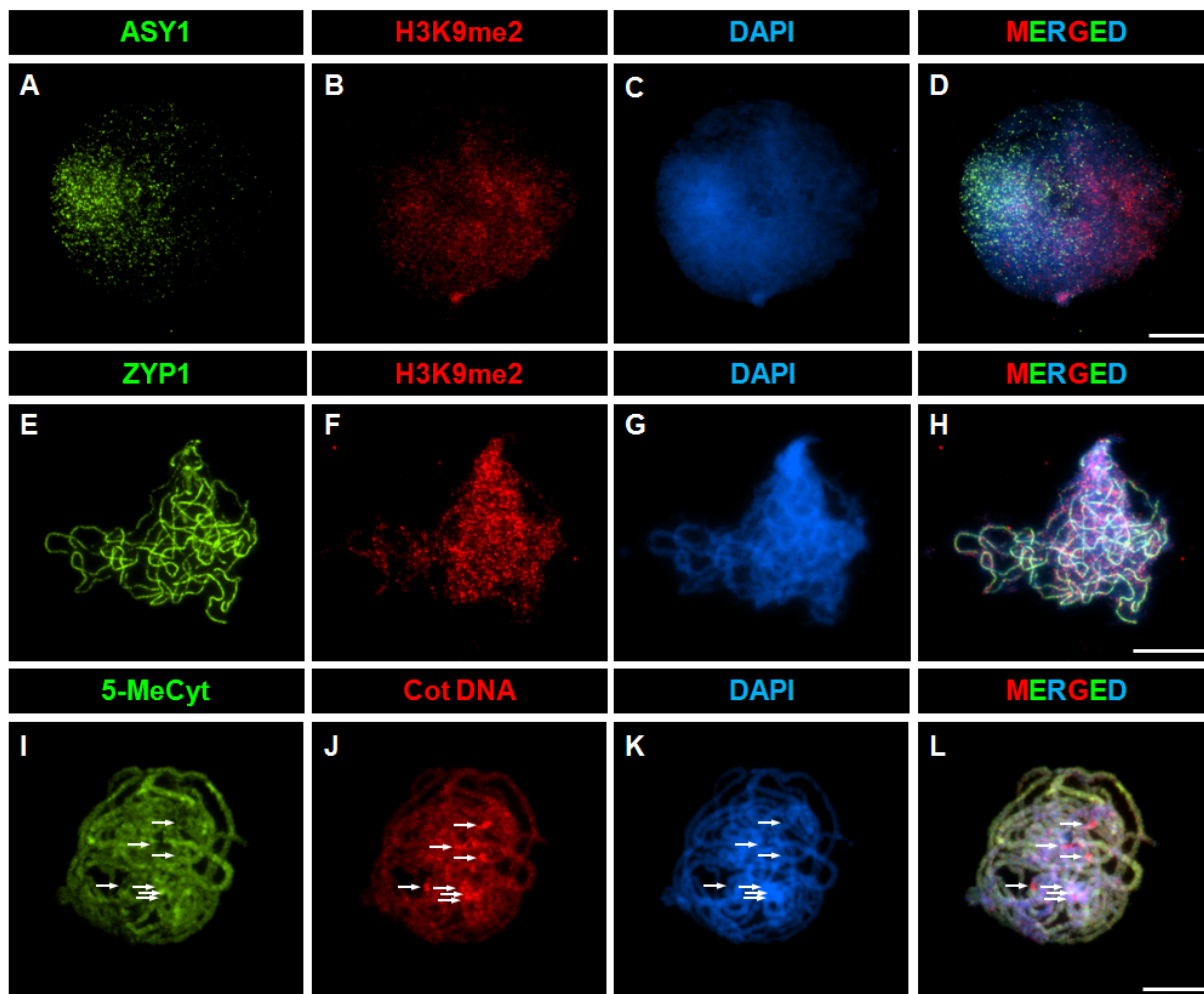

**Supplemental Figure 8** Heterochromatin, methylated DNA and repetitive Cot DNA, are abundant throughout the barley chromosomes

The heterochromatin mark histone 3 lysine 9 dimethylation (H3K9me3) (**B,F**) occurs throughout the nucleus during prophase I but appears less abundant in the chromosome distal regions where ASY1 is loading (**A, D**). The methylated DNA nucleoside 5-methyl cytidine (5-MeCyt) is also abundant throughout the chromosomes during pachytene (**I**) along with fluorescence *in situ* hybridization of barley repeat sequence Cot DNA (**J**), DAPI (**K**) and merged (**L**), showing centromeres with white arrows. Bar, 10 $\mu$ M.



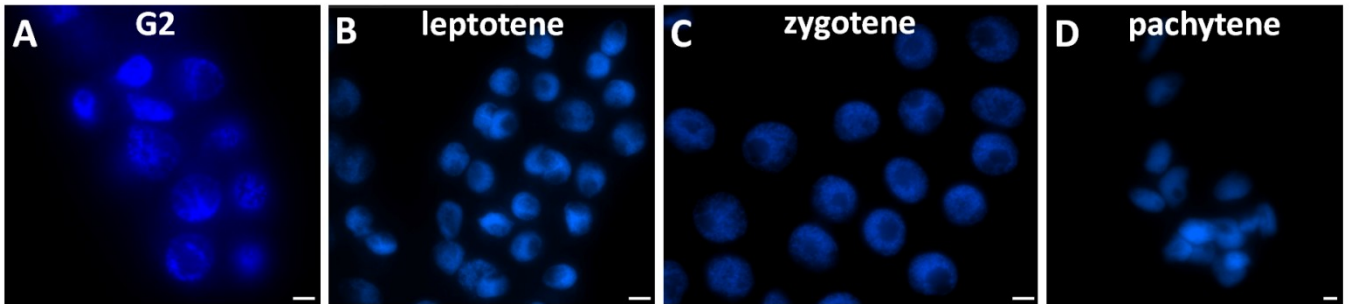

**Supplemental Figure 9** Undigested meiocytes squeezed out of the anther locules shows that nuclear volume changes *in vivo*, but not as much as cell wall free nuclei.

Meiotic stages were determined by measuring anther lengths and sizes of nuclei by tracing round the DAPI (blue) stained areas. **A**, G2 =  $485\mu\text{m}^2$  (n=45); **B**, leptotene =  $479\mu\text{m}^2$  (n=45); **C**, zygotene =  $449\mu\text{m}^2$  (n=45); **D**, pachytene =  $283\mu\text{m}^2$  (n=45). Bar,  $10\mu\text{M}$ .

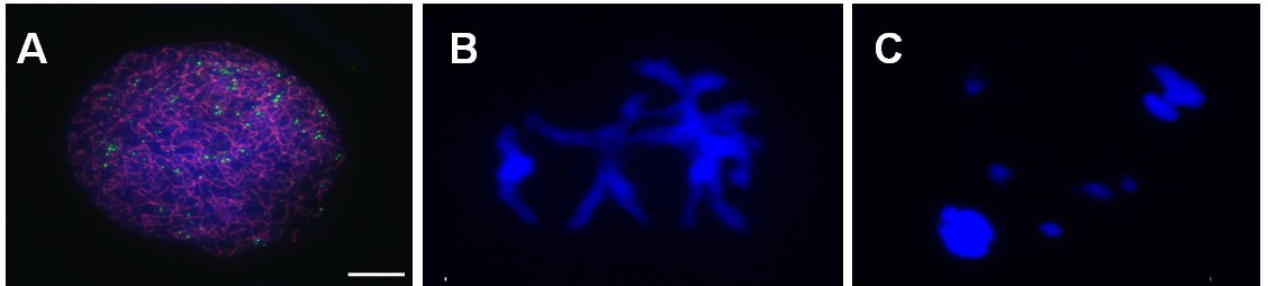

**Supplemental Figure 10** Meiotic defects at 35°C

**(A)** In a mid-prophase I nucleus ZYP1 foci (green) are observed but do not elongate when ASY1 is linear (red). **(B)** Metaphase I chromosomes have unusual shapes that are agglomerated, leading to aberrant segregation **(C)**. Bar, 10 $\mu$ M.

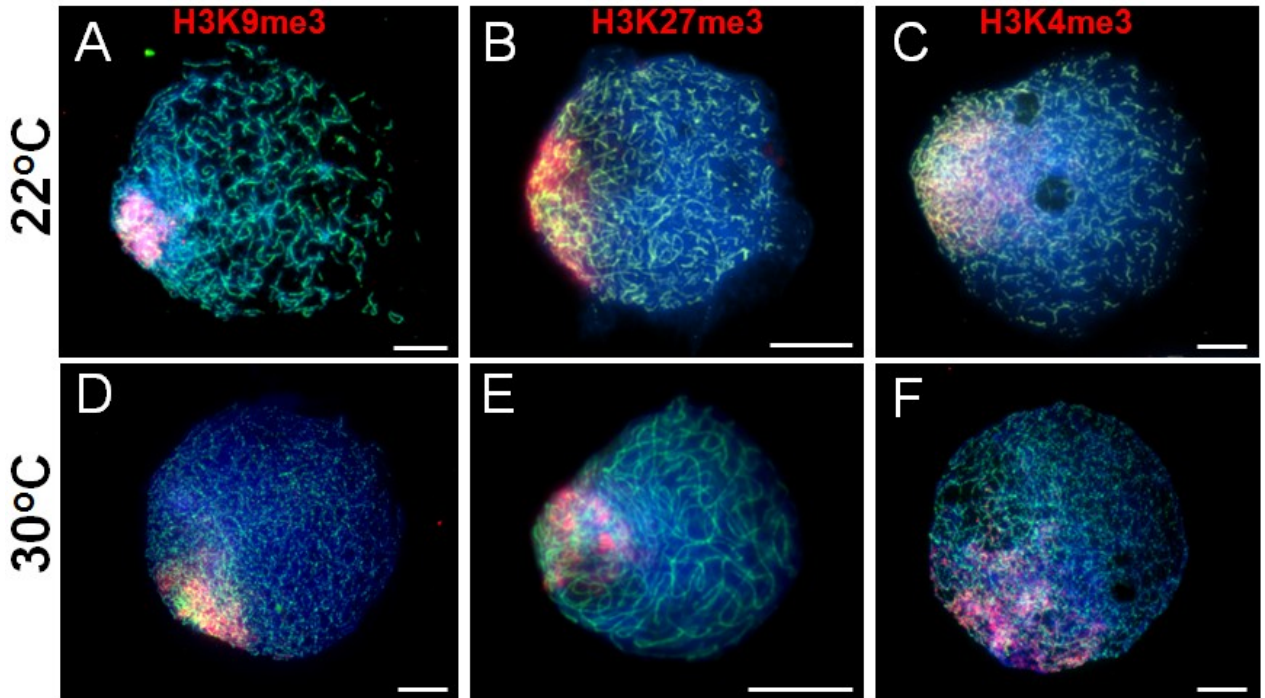

**Supplemental Figure 11** Sub-telomeric euchromatic histone marks are indistinguishable at 22°C and 30°C

Histone 3 tri-methylated lysine 9 (H3K9me3) (A,D), histone 3 tri-methylated lysine 27 (H3K27me3) (D,E) and histone 3 tri-methylated lysine 4 (H3K4me3) (C,F) (red) immunolocalisation was indistinguishable between 22°C (A,B,C) and 30°C (D,E,F). Stages were identified with anti-ASY1 (green) counterstained with DAPI (blue). Bar, 10µM.

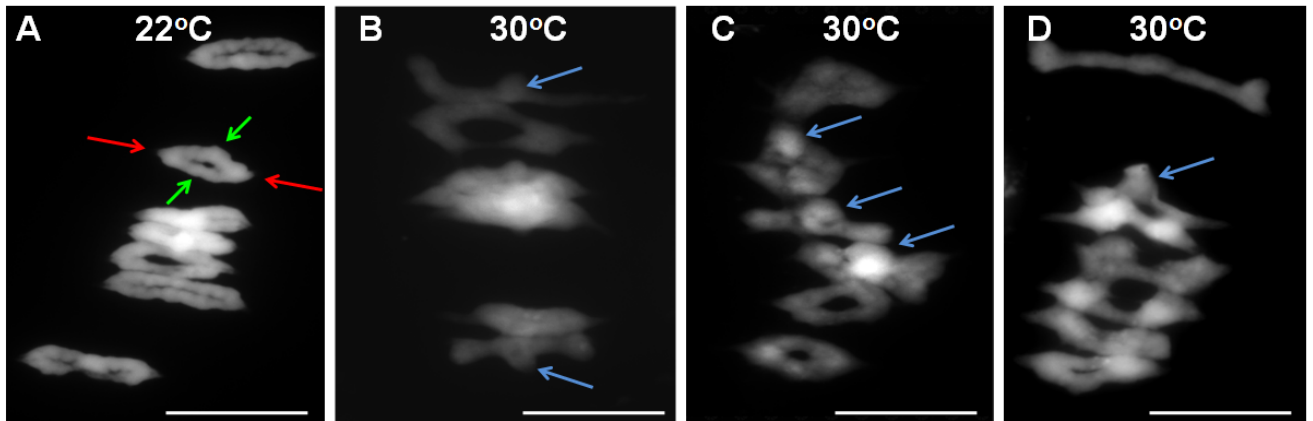

**Supplemental Figure 12** Metaphase I chromosome spreads reveal increased interstitial chiasmata in plants grown at 30°C compared to 22°C

**(A)** At 22°C seven ring bivalents typically form with distal chiasmata (green arrows) and centromeres (red arrows) highlighted. **(B,C,D)** At 30°C, rod bivalents are more prevalent with increased interstitial chiasmata (blue arrows). Bar, 10 $\mu$ M.

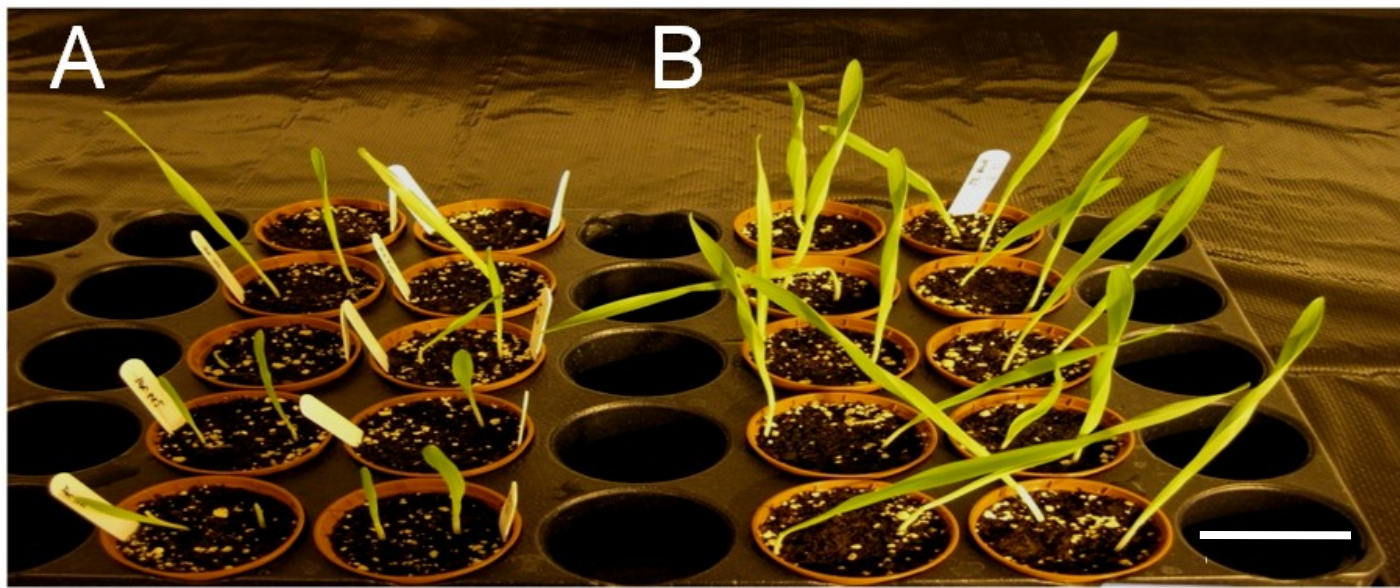

**Supplemental Figure 13** Post-meiotic fertility

Seeds collected from plants grown at 30°C were sown and 15/20 germinated (**A**) compared to the control where seeds were collected from plants grown at 22°C and 19/20 germinated (**B**). Bar, 5cm.

| Gene name          | cDNA fragment | Oligonucleotide                 | 5'-Sequence-3'                   |
|--------------------|---------------|---------------------------------|----------------------------------|
| RAD51              | 3'RACE        | Rad51_F1                        | CCTTCAGAAATTAGCGGATGA            |
|                    |               | <b>Rad51_F2</b>                 | <b>ATTGGAGGGAACATCATGGCTCAC</b>  |
|                    | 5'RACE        | Rad51_R1                        | AGCCTTTCCTTCACCACCACCTTG         |
|                    |               | <b>Rad51_R2</b>                 | <b>CTAGTGAACCCCAGTGAACCAAC</b>   |
|                    | Full length   | Rad51_FL_F1                     | AACCCCAAAACCCGCTCCCCTGC          |
|                    |               | <b>Rad51_FL_F2</b>              | <b>CGCCTCCCCTGCTAGAGAAGAGAG</b>  |
|                    |               | Rad51_FL_R1                     | GGACCCAAGGAATATCGCTTCTTAC        |
| <b>Rad51_FL_R2</b> |               | <b>TCTTACGGAGGGGCAAATCCATC</b>  |                                  |
| DMC1               | 3'RACE        | DMC1_F1                         | CGCATACACCTATGAGCACCAGTAC        |
|                    |               | <b>DMC1_F2</b>                  | <b>TTGCTGAGGAGTTCAATGTTGCAG</b>  |
|                    | 5'RACE        | DMC1_R1                         | CAACACGGAATAGCGCAATCACAG         |
|                    |               | <b>DMC1_R2</b>                  | <b>AGCAGCCTCGCAGATCTTATCAAC</b>  |
|                    | Full length   | DMC1_FL_F1                      | GAACGTCAGCGCCCCGTTCA             |
|                    |               | <b>DMC1_FL_F2</b>               | <b>ATGGGCCTAGCTGGCAGCAGCAAAG</b> |
|                    |               | DMC1_FL_R1                      | AAGCAAGAATCAAGAGACGGCGTA         |
| <b>DMC1_FL_R2</b>  |               | <b>AAGAGACGGCGTATTTCAATCTTC</b> |                                  |
| MSH4               | 3'RACE        | Msh4_F1                         | TTGAAGTACTCGAACCAAGGGGATG        |
|                    |               | <b>Msh4_F2</b>                  | <b>CAACCGTGAAGCATTGCAGGACCTC</b> |
|                    | 5'RACE        | Msh4_R1                         | GTCCACTTTCAGTATCGGACTCTG         |
|                    |               | <b>Msh4_R2</b>                  | <b>TTGCCTGCAGCGTAACTCTCCTT</b>   |
|                    | Full length   | Msh4_FL_F1                      | CGCGCACACACCAGCTAGCAGC           |
|                    |               | <b>Msh4_FL_F2</b>               | <b>CGTAGTTGCATCCTCCAGGGTTC</b>   |
|                    |               | Msh4_FL_R1                      | GCTTGTACTTTTAGGACATATCAC         |
| <b>Msh4_FL_R2</b>  |               | <b>CGCCACAACCTTATGTGTCCCCAG</b> |                                  |

|      |             |                   |                                    |
|------|-------------|-------------------|------------------------------------|
| MSH5 | 3'RACE      | Msh5_F1           | GGTTCTACTACCATACTCAAAAGACA         |
|      |             | <b>Msh5_F2</b>    | <b>TTACATCAAGTTGGAACAATGCTC</b>    |
|      | 5'RACE      | Msh5_R1           | TCACGTACAACGCTCTGCTGGTTC           |
|      |             | <b>Msh5_R2</b>    | <b>AATCATAATTTGCAAAATGACTGATGG</b> |
|      | Full length | Msh5_FL_F1        | GGACACTGACATGGACTGAAGGAG           |
|      |             | <b>Msh5_FL_F2</b> | <b>ACATGGACTGAAGGAGTAGAAAAG</b>    |
|      |             | Msh5_FL_R1        | TGGATGGTCAAAACCGATTCTC             |
|      |             | <b>Msh5_FL_R2</b> | <b>CCGATTCTCGTTTGAATATGCTG</b>     |
| MLH1 | 3'RACE      | Mlh1_F1           | GTCCAGTCGCCATGAGCTTGTTAC           |
|      |             | <b>Mlh1_F2</b>    | <b>GATCAGTACACTCCTGATATGGATC</b>   |
|      | 5'RACE      | Mlh1_R1           | GCAGCTGCTGCCGTTCTGAAGCAC           |
|      |             | <b>Mlh1_R2</b>    | <b>TGCAAACCGACTGATGAAGTCCAC</b>    |
|      | Full length | Mlh1_FL_F1        | TCCGCCCGGTCCCCAGACGC               |
|      |             | <b>Mlh1_FL_F2</b> | <b>AGACGCGGCGCGGCGGCATG</b>        |
|      |             | Mlh1_FL_R1        | AGCAGAGCCAAATCATTCTGTCAT           |
|      |             | <b>Mlh1_FL_R2</b> | <b>CAGGGCTGAGCTGGAGCCCAGC</b>      |
| ZYP1 | 3'RACE      | Zyp1_F1           | AATGGATCAGAGTTACAAGGAACAG          |
|      |             | <b>Zyp1_F2</b>    | <b>AGCTTCTAGGAAGAATGCAGTCAG</b>    |
|      | 5'RACE      | Zyp1_R1           | TGTTGCTCTTCTCAGCTTGGTATG           |
|      |             | <b>Zyp1_R2</b>    | <b>CTTCACCGAGGCCTGCTCCTTGAC</b>    |
|      | Full length | Zyp1_FL_F1        | CCCTCTCCCCCTCCGCGTTCGTG            |
|      |             | <b>Zyp1_FL_F2</b> | <b>GGCCTGGTGCTGCCGCCGTCGACG</b>    |
|      |             | Zyp1_FL_R1        | AACGACAGGAAACCTGAGATTCC            |
|      |             | <b>Zyp1_FL_R2</b> | <b>CAAGACGGTCATTGGCTGGGTGTG</b>    |

|      |             |                   |                                 |
|------|-------------|-------------------|---------------------------------|
| ASY1 | 3'RACE      | Asy1_F1           | CTAATGATGCTAACAGTGACGATG        |
|      |             | <b>Asy1_F2</b>    | <b>TACTGGAAGTTGATATCACTGAAG</b> |
|      | 5'RACE      | Asy1_R1           | AACCTTGTTAACAGCATAACCATC        |
|      |             | <b>Asy1_R2</b>    | <b>TTGCTCCCTGTGCGACTCATGTTC</b> |
|      | Full length | Asy1_FL_F1        | CCCTCCCACGCGCACACACAGCAC        |
|      |             | <b>Asy1_FL_F2</b> | <b>CACCACCAGGGCGGCAAAATGGTG</b> |
|      |             | Asy1_FL_R1        | GCAGAAAATGACTTGCTCCGATTC        |
|      |             | <b>Asy1_FL_R2</b> | <b>AAATGACTTGCTCCGATTCAGTAC</b> |

**Supplemental Table 1:** Primers used for cloning barley meiotic cDNAs

Two successive PCR reactions were carried out for each fragment. 1 µl of the barley inflorescence cDNA (see Material and Methods) was used as a template with the forward (F1) and reverse (R1) primers. 1 µl of this primary reaction was added in the secondary reaction with the corresponding nested primers indicated in **bold** (forward (F2) and reverse (R2)). The 3'RACE and 5'RACE oligonucleotides were used in combination with the GeneRacer 3' and 5' primers (Invitrogen), respectively. Oligonucleotides are shown 5'-3'.
